# Supplementary material for: Pentagonal PdX2 (X = S, Se) nanosheets with X vacancies as high-performance electrocatalysts for the hydrogen evolution reaction
Source: Royal Society of Chemistry journal article supplement (doi:10.1039/d2cp00393g), 2022-01-01
Supplement: d2cp00393g1.pdf [file d2cp00393g1.pdf]

Electronic Supplementary Information (ESI)

**Pentagonal PdX<sub>2</sub> (X = S, Se) nanosheets with X vacancies as high-performance electrocatalysts for the hydrogen evolution reaction**

Shulin Xu, Yu Wang\* and Yafei Li\*

Jiangsu Key Laboratory of New Power Batteries, Jiangsu Collaborative Innovation Centre of Biomedical Functional Materials, School of Chemistry and Materials Science, Nanjing Normal University, Nanjing 210023, China

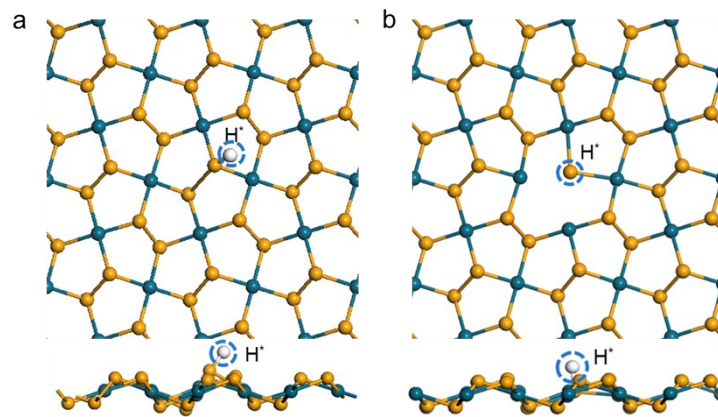

**Fig. S1** Views of the structures of (a) pristine and (b) defective SL PdSe<sub>2</sub> with absorbed H<sup>\*</sup>.

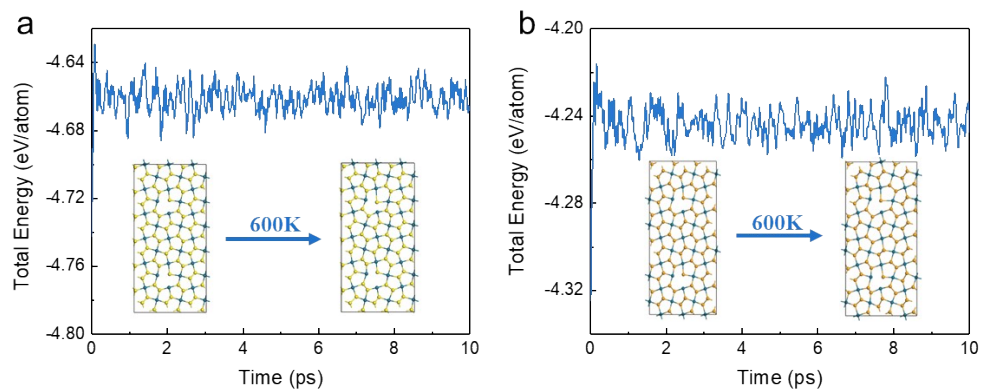

**Fig. S2** Total energy during AIMD simulations for  $3 \times 3$  SL (a) PdS<sub>2</sub> and (b) PdSe<sub>2</sub> supercells with one S and Se vacancy. Insets show the snapshots of initial and final atomic configurations of AIMD simulations.

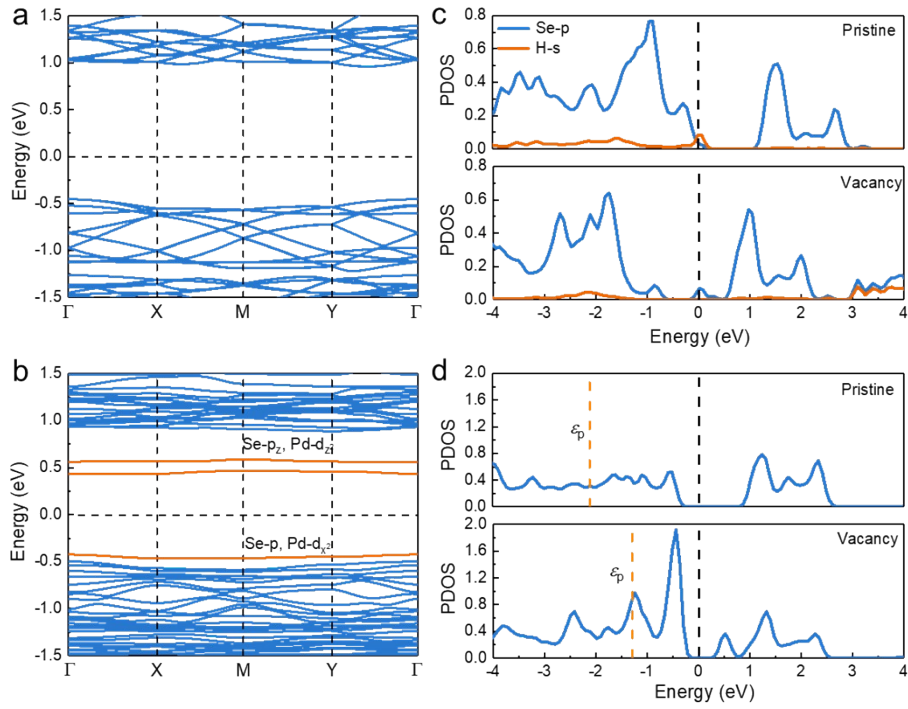

**Fig. S3** Band structures of (a) pristine and (b) defective PdSe<sub>2</sub> with 2.78% V<sub>Se</sub>. Three defect states in the gap are highlighted in orange. (c) The p-orbital PDOS of H\* on the pristine and defective SL PdSe<sub>2</sub>. (d) The p-orbital PDOS of the active Se sites of pristine and defective SL PdSe<sub>2</sub>. The orange dashed lines represent the position of p-band center  $\epsilon_p$ .

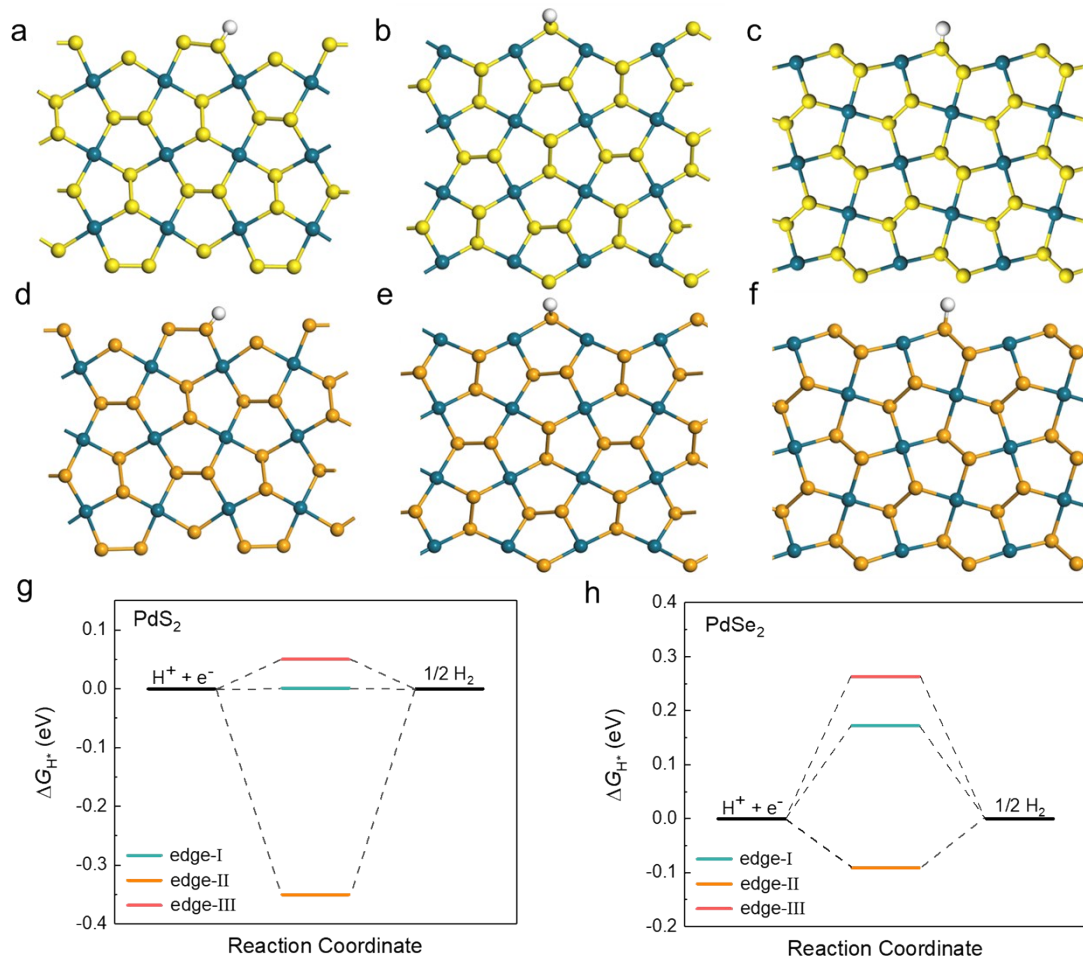

**Fig. S4** Structural models of hydrogen adsorption at three kinds of edge sites in (a-c) PdS<sub>2</sub> and (d-f) PdSe<sub>2</sub>. Hydrogen adsorption free energy of (g) PdS<sub>2</sub> and (h) PdSe<sub>2</sub> with different edges.

**Table S1** Calculated hydrogen adsorption energy  $\Delta E_{\text{H}}$  (eV) and Gibbs free energy  $\Delta G_{\text{H}^*}$  (eV) of the Pd or X site of SL PdX<sub>2</sub>.

| Adsorption sites        | $\Delta E_{\text{H}}$ (eV) | $\Delta G_{\text{H}^*}$ (eV) |
|-------------------------|----------------------------|------------------------------|
| Pd (PdS <sub>2</sub> )  | 1.55                       | 1.84                         |
| S (PdS <sub>2</sub> )   | 1.02                       | 1.31                         |
| Pd (PdSe <sub>2</sub> ) | 1.28                       | 1.54                         |
| Se (PdSe <sub>2</sub> ) | 1.08                       | 1.34                         |
